# Supplementary material for: Antibacterial Activity against Clinical Isolates and In Vivo Efficacy of Coralmycins
Source: MDPI journal article supplement (doi:10.3390/antibiotics11070902), 2022-07-06
Supplement: s1 [file s1]

## Supplementary data

### **Antibacterial activities against clinical isolates and *in vivo* efficacy of coralmycins**

Ha-Young Choi<sup>1,2</sup>, Bo-Min Kim<sup>1,2</sup>, Young-Rok Kim<sup>3</sup>, Taehui Yang<sup>1</sup>, Sunjoo Ahn<sup>4</sup>, Dongeun Yong<sup>5</sup>, Jin-Hwan Kwak<sup>3</sup>, and Won-Gon Kim<sup>1, 2,\*</sup>

<sup>1</sup> Infectious Disease Research Center, Korea Research Institute of Bioscience and Biotechnology, Yusong, Daejeon 305-806, Republic of Korea

<sup>2</sup> Department of Bio-Molecular Science, KRIBB School of Bioscience, Korea University of Science and Technology (UST), Yusong, Daejeon 305-806, Republic of Korea

<sup>3</sup> School of Life Science, Handong Global University, Pohang, Republic of Korea

<sup>4</sup> Bio and Drug Discovery Division, Korea Research Institute of Chemical Technology, 141 Gajeong-ro, Yusong, Daejeon 34114, Republic of Korea

<sup>5</sup> Department of Laboratory Medicine and Research Institute of Bacterial Resistance, Yonsei University College of Medicine, Seoul, Republic of Korea

\* Corresponding author. Tel: +82 42 860 4298; E-mail: wgkim@kribb.re.kr. ORCID ID: 0000-0001-5951-4581

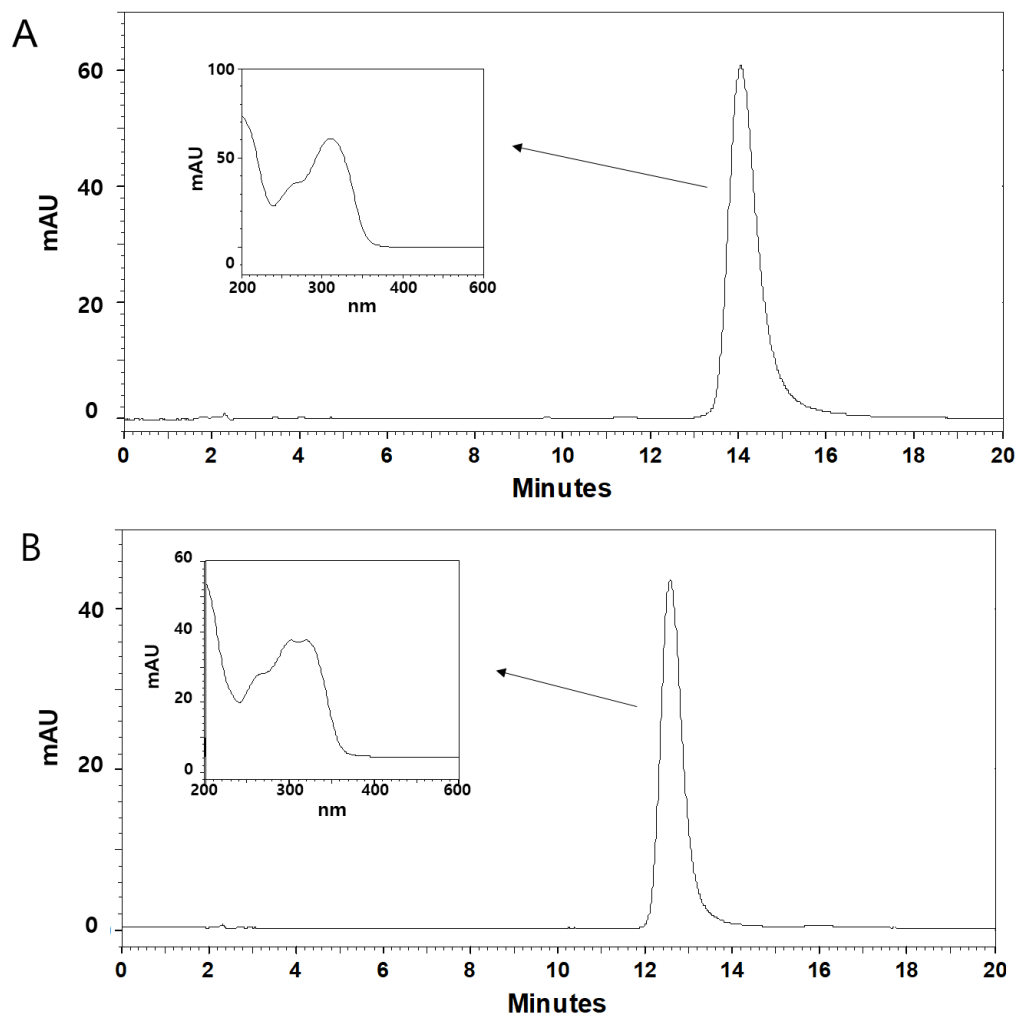

**Figure S1.** Purity test of coralmycin A and DH-coralmycin A isolated from a large-scale *C. coralloides* M23 culture. The coralmycin A (A) and DH-coralmycin A (B) purities were determined to be all over 95% at 225 nm using an analytical HPLC column (J'sphere ODS-H80,  $4.6 \times 150$  mm, S-4  $\mu$ m, YMC) with  $\text{CH}_3\text{CN}:\text{H}_2\text{O}$  (45:55) containing 0.01% TFA at a flow rate of 0.8 mL/min.

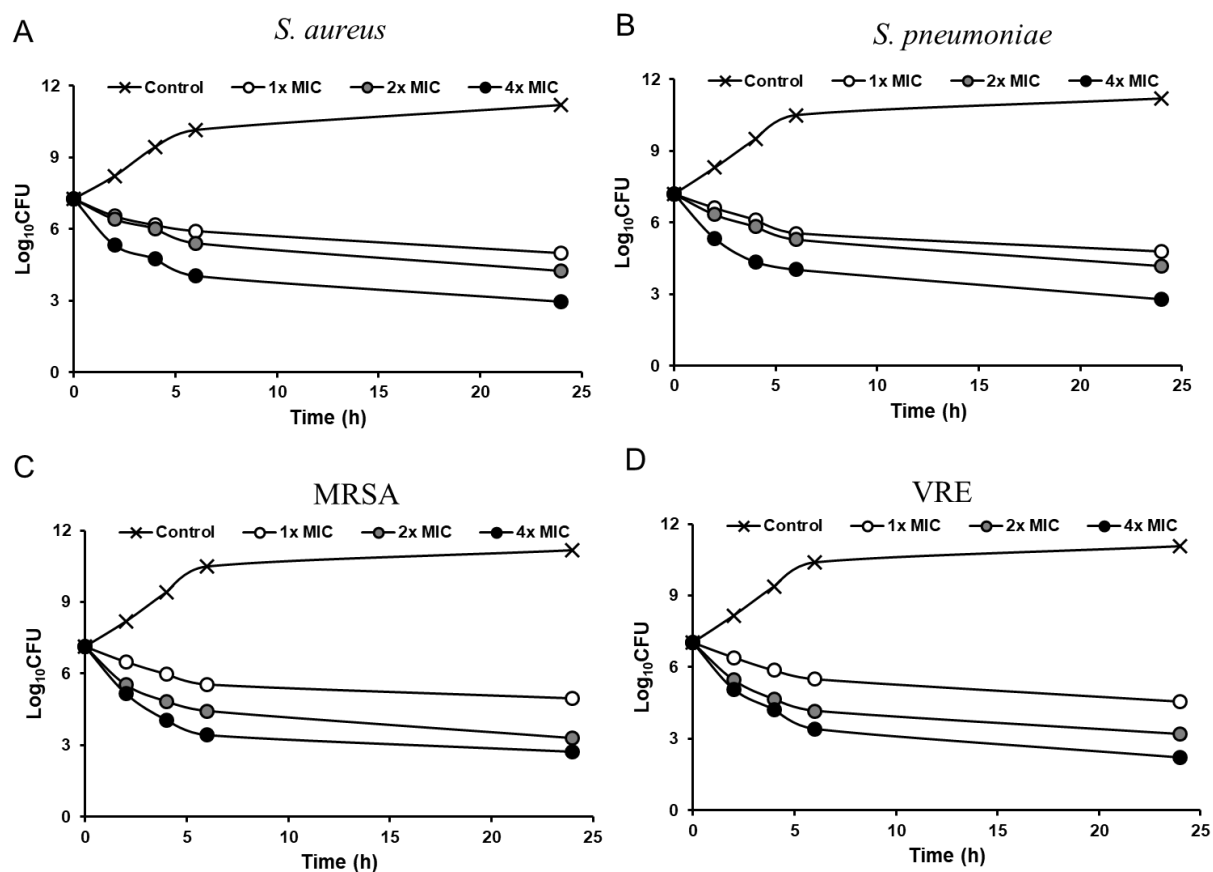

**Figure S2.** Time-kill curves of DH-coralmycin A. MIC values (mg/L) against *S. aureus* Giorgio (A), *S. pneumoniae* ATCC49619 (B), MRSA CCARM 3167 (C), and VRE 3 (D) were 0.06, 0.25, 0.25, and 2, respectively.

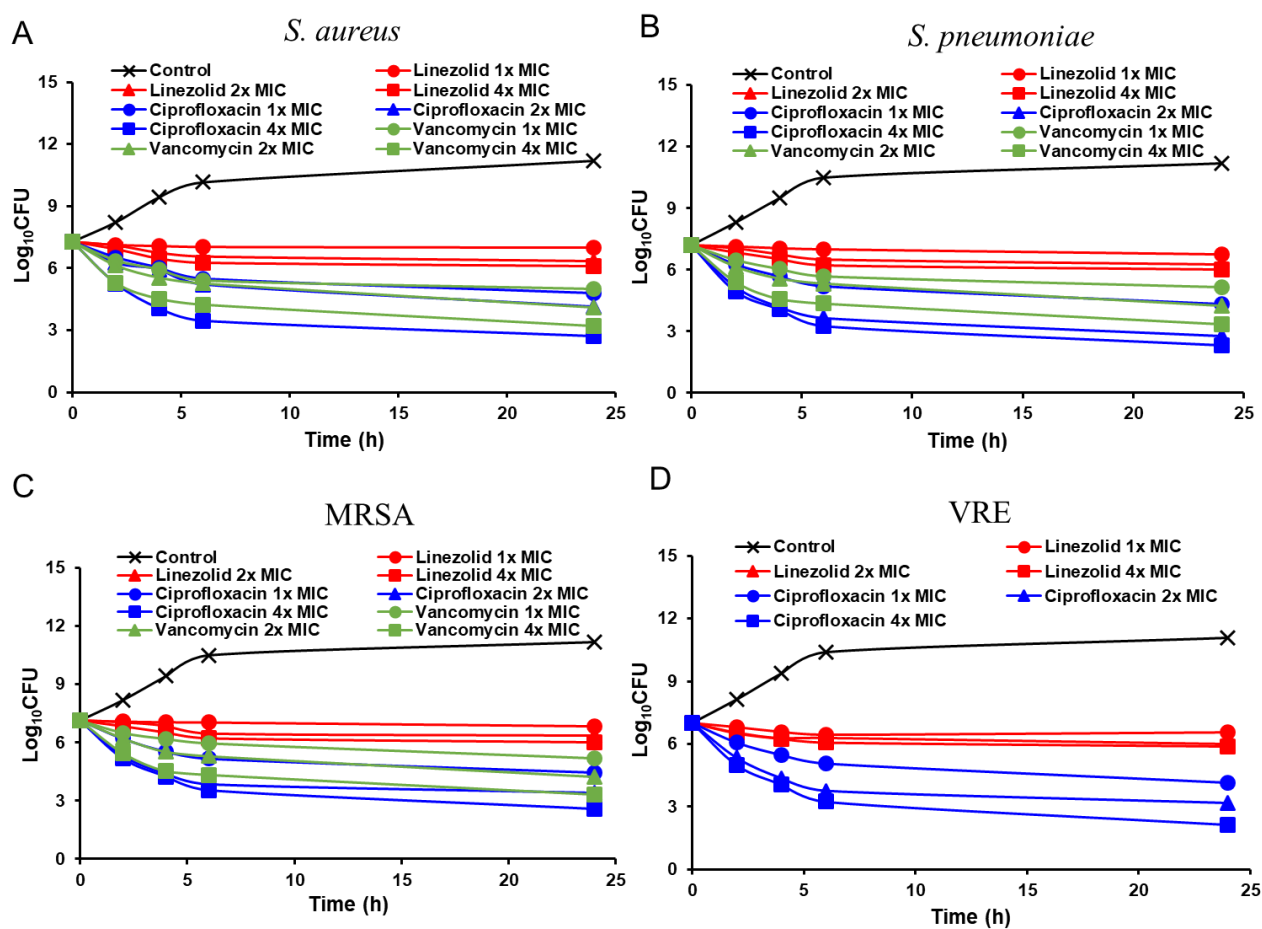

**Figure S3.** Time-kill curves of linezolid, ciprofloxacin, and vancomycin as comparators. MIC values (mg/L) against *S. aureus* Giorgio (A), *S. pneumoniae* ATCC49619 (B), MRSA CCARM 3167 (C), and VRE 3 (D) were 2, 2, 1, and 2, respectively, for linezolid; 0.06, 0.25, 4, and 16, respectively, for ciprofloxacin; 2, 0.5, 2, and 64, respectively, for vancomycin.

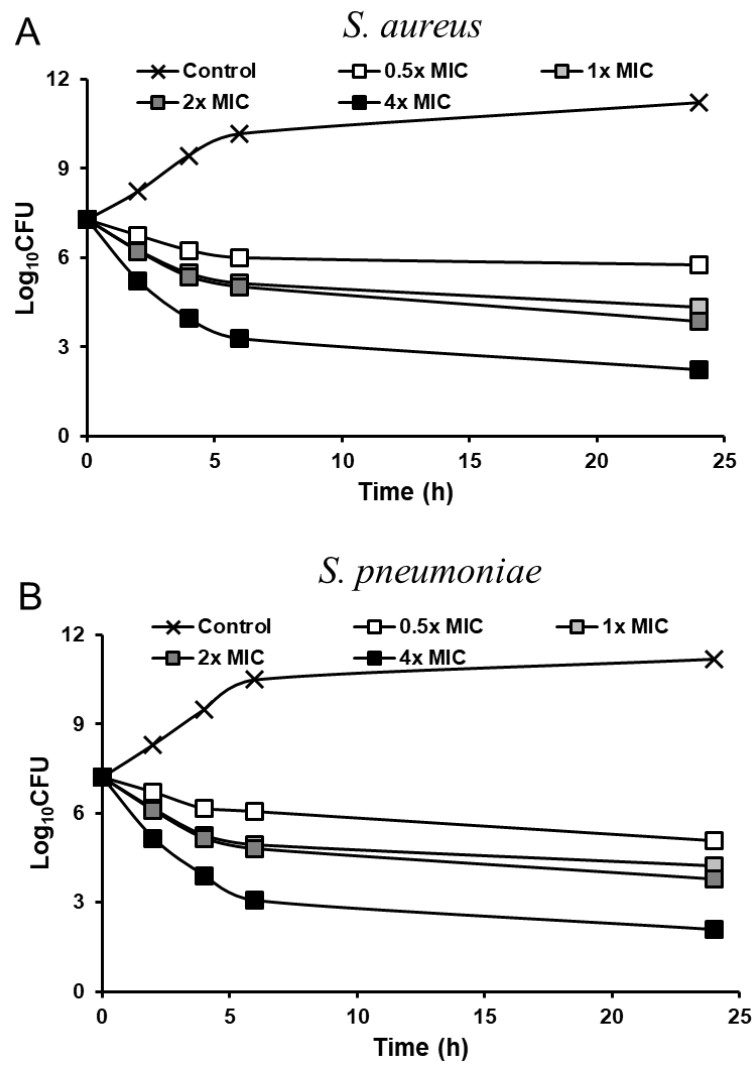

**Figure S4.** Time-kill curves of coralmycin A at concentrations below and above the MIC. MIC values (mg/L) against *S. aureus* Giorgio (A) and *S. pneumoniae* ATCC49619 (B) were 0.006 and 0.025, respectively.

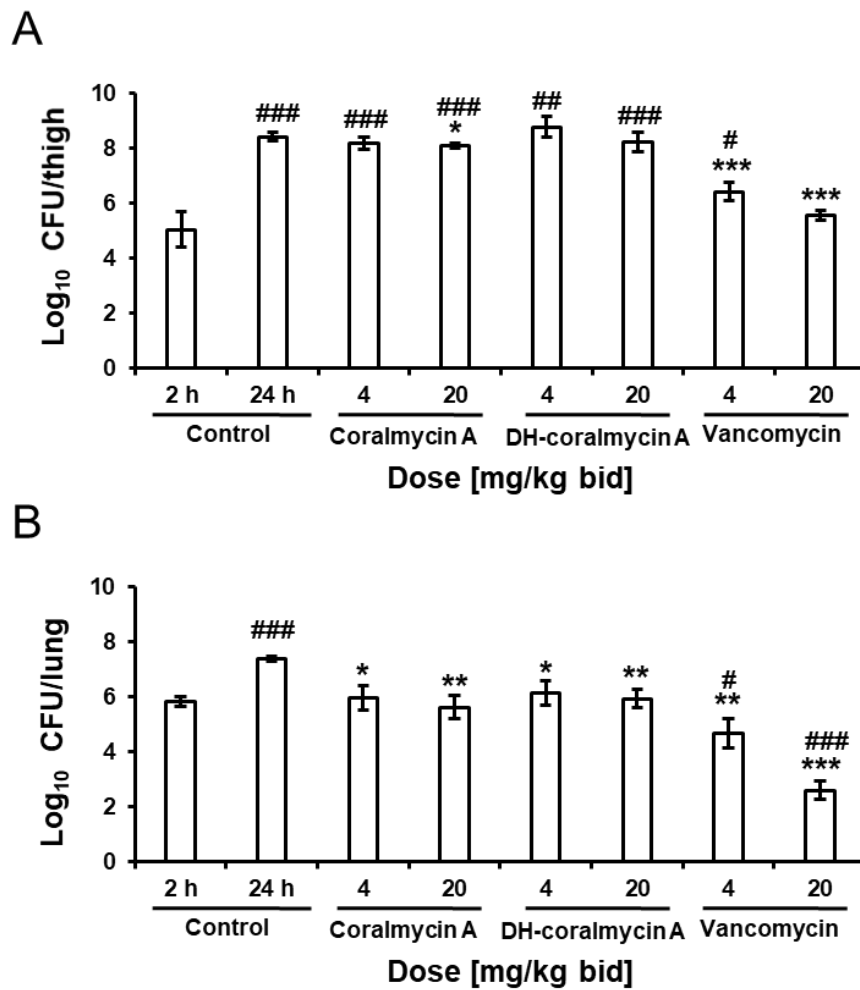

**Figure S5.** Therapeutic efficacies of coralmycins in two mouse models of thigh and lung infection. (A) a mouse model of thigh infection induced by *S. aureus* Giorgio. The MICs for coralmycin A, DH-coralmycin A, and vancomycin against *S. aureus* Giorgio were 0.003, 0.06, and 2 mg/L, respectively. (B) a mouse model of lung infection induced by intranasal inoculation of *S. pneumoniae* ATCC49619. The MICs of coralmycin A, DH-coralmycin A, and vancomycin against *S. pneumoniae* ATCC49619 were 0.01, 0.25, and 0.5 mg/L, respectively. CFU in the thighs or lungs (n=4) of vehicle- and drug-treated mice were determined. The experiment shown is representative of two independent experiments. Data are expressed as the mean  $\pm$  SD (n = 4; \* $P$  < 0.01, \*\* $P$  < 0.001, and \*\*\* $P$  < 0.0001 versus 24 h control; # $P$  < 0.01, ## $P$  < 0.001, and ### $P$  < 0.0001 versus 2 h control).  $P$  values were obtained using unpaired Student's  $t$  test.
